# Supplementary material
Source: Springer Nature journal article supplement (https://www.springermedizin.de/resource/supplementary/13051_2010_119_MOESM3_ESM.pdf/9669976)

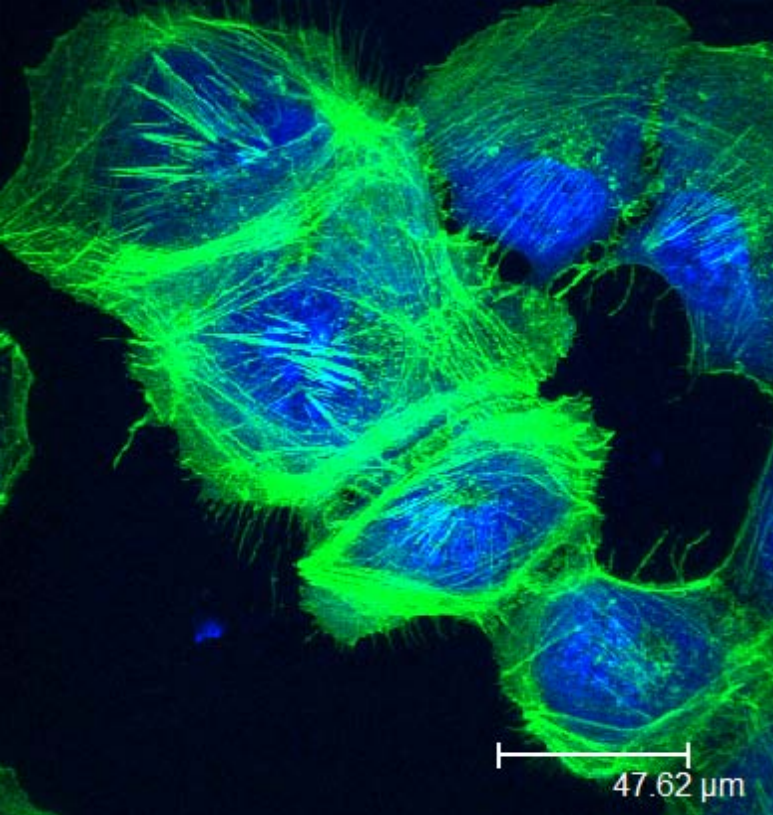

47.62  $\mu\text{m}$

Supplement: MOESM3 [file 9669976]
